# Supplementary material for: Chemotherapy delivery time affects treatment outcomes of female patients with diffuse large B cell lymphoma
Source: PubMed Central journal article supplement (PMC9977288; doi:10.1172/jci.insight.164767), 2023-01-24
Supplement: jciinsight-8-164767-s090.pdf [file jciinsight-8-164767-s090.pdf]

1 Supplemental Figures for  
2 **Chemotherapy delivery time affects treatment outcomes of female patients**  
3 **with diffuse large B-cell lymphoma**  
4

5 Dae Wook Kim<sup>1,2,5,a</sup>, Ja Min Byun<sup>3,5</sup>, Jeong-Ok Lee<sup>4</sup>, Jae Kyoung Kim<sup>1,2\*</sup>, Youngil Koh<sup>3\*</sup>

6  
7 <sup>1</sup>Department of Mathematical Sciences, Korea Advanced Institute of Science and Technology,  
8 Daejeon, Korea, 34141

9 <sup>2</sup>Biomedical Mathematics Group, Institute for Basic Science, Daejeon, Korea, 34126

10 <sup>3</sup>Department of Internal Medicine, Seoul National University College of Medicine, Seoul  
11 National University Hospital, Seoul, Korea, 110744

12 <sup>4</sup>Department of Internal Medicine, Seoul National University College of Medicine, Seoul  
13 National University Bundang Hospital, Seongnam, Korea, 463707

14 <sup>5</sup>Equally contributed

15 <sup>a</sup>Current Address: Department of Mathematics, University of Michigan, Ann Arbor, MI, USA,  
16 48109

17 \*Corresponding authors. Email: go01@snu.ac.kr and jaekkim@kaist.ac.kr

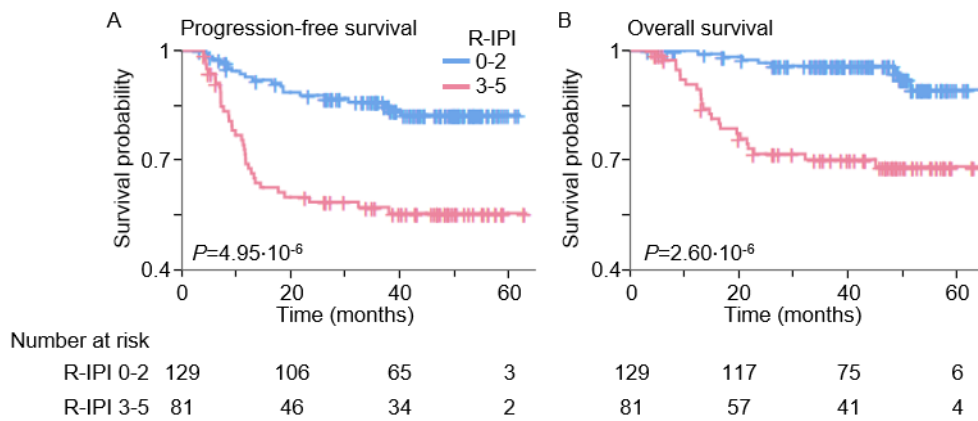

18

19 **Supplemental Figure 1. Kaplan-Meier curves of progression-free survival (A) and overall**  
 20 **survival (B) according to R-IPI.** PFS and OS decreased in patients with R-IPI 0-2 compared  
 21 to patients with R-IPI 3-5. Cross (+) indicates censoring of data. Here, 129 patients with R-IPI  
 22 0-2 and 81 patients with R-IPI 3-5 in the survival cohort were analyzed. *P*-values were  
 23 calculated by log-rank test.

24

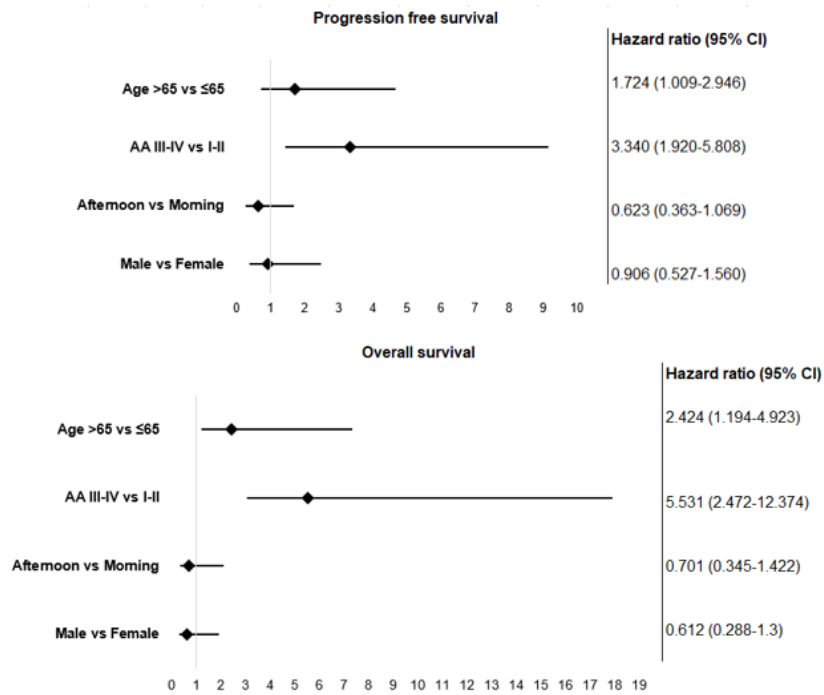

25

26 **Supplemental Figure 2. Forest plots showing hazard ratios for survival.** The upper and  
 27 lower panels show the hazard ratios for progression-free survival and overall survival,  
 28 respectively. Here, 210 patients in the survival cohort were analyzed.

29

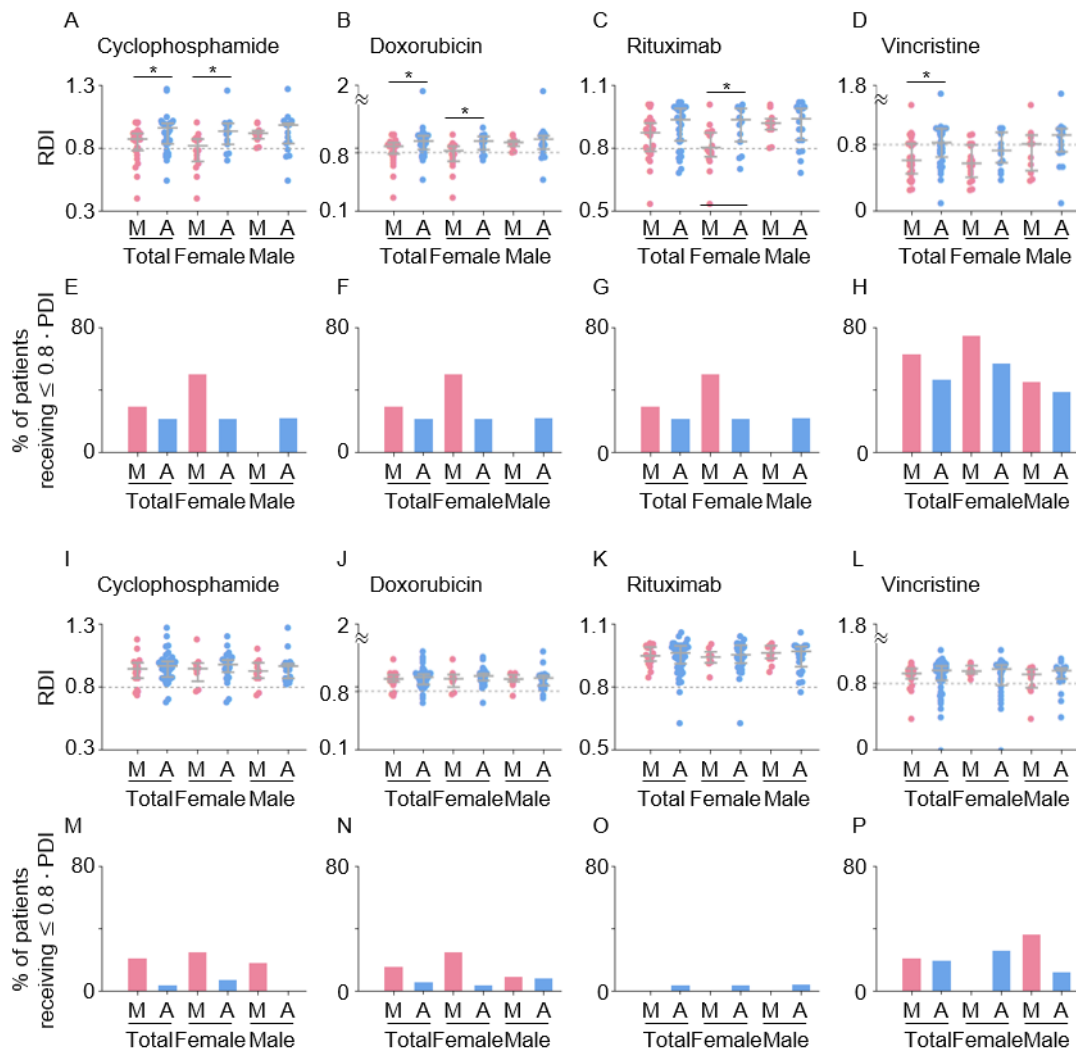

30

31 **Supplemental Figure 3. Dose intensity according to sex and the time of the day of R-**  
 32 **CHOP delivery in the two independent cohorts. (A-D)** RDI (relative dose intensity) of  
 33 cyclophosphamide (A), doxorubicin (B), rituximab (C), and vincristine (D) in MG and AG,  
 34 female MG and AG, and male MG and AG of the Seoul National University Hospital adverse  
 35 event cohort. **(E-H)** The fraction of patients receiving less than 80% of PDI (planned dose  
 36 intensity) of cyclophosphamide (E), doxorubicin (F), rituximab (G), and vincristine (H) in MG  
 37 and AG, female MG and AG, and male MG and AG of the Seoul National University Hospital  
 38 adverse event cohort. **(I-L)** RDI of cyclophosphamide (I), doxorubicin (J), rituximab (K), and  
 39 vincristine (L) in MG and AG, female MG and AG, and male MG and AG of the Seoul National

40 University Bundang Hospital adverse event cohort. **(M-P)** The fraction of patients receiving  
41 less than 80% of PDI of cyclophosphamide (M), doxorubicin (N), rituximab (O), and  
42 vincristine (P) in MG and AG, female MG and AG, and male MG and AG of the Seoul National  
43 University Bundang Hospital adverse event cohort. Here, RDI was calculated as in Figure 4.  
44 129 patients in the adverse event cohort were analyzed. *P*-values in (A-D) and (I-L) were  
45 calculated by Mann-Whitney *U* test. *P*-values in (E-H) and (M-P) were calculated by Chi-  
46 square test. Error bar denotes IQR.

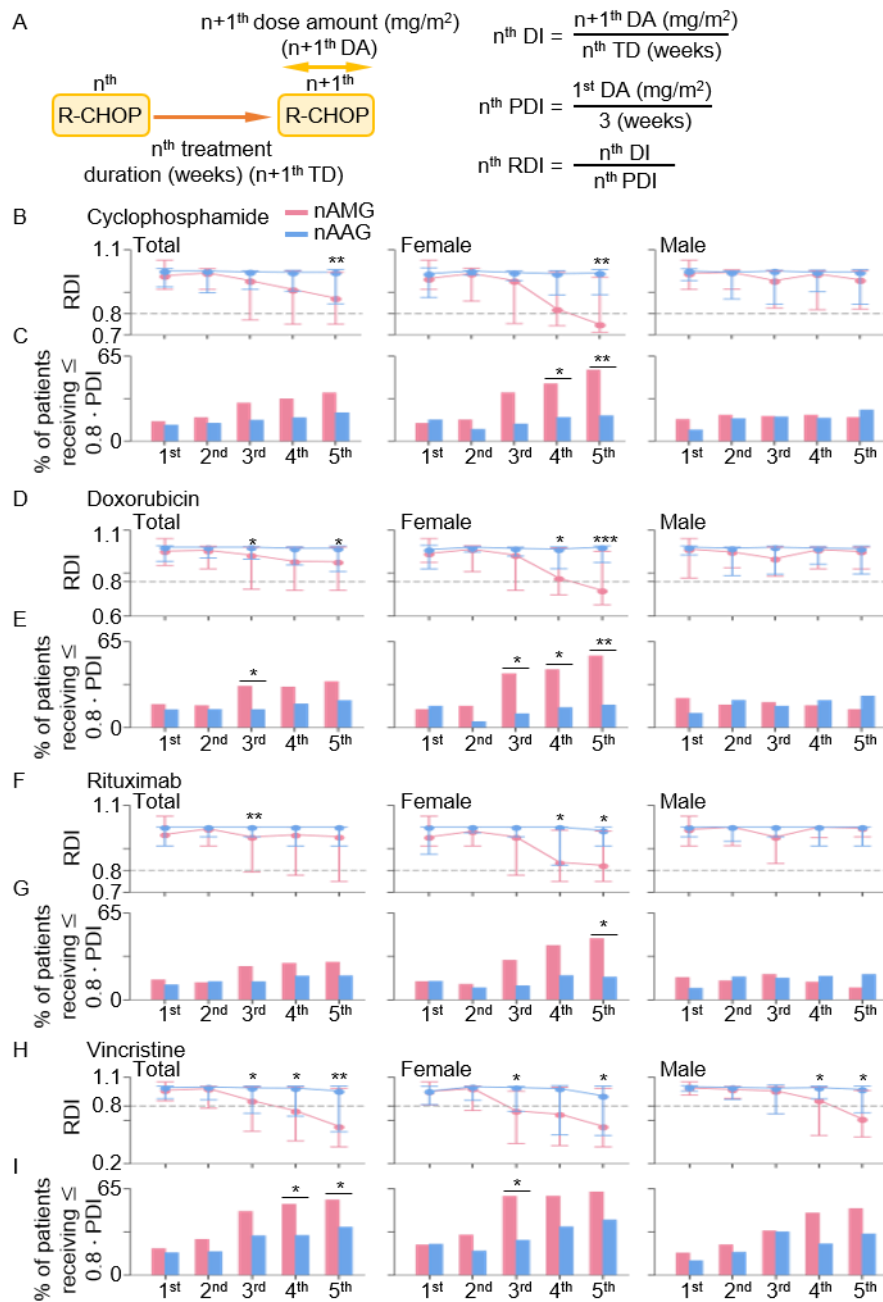

47

48 **Supplemental Figure 4. Dose intensity for a treatment cycle according to sex and the**  
 49 **accumulated number of morning treatments before the cycle. (A) Definition of  $n^{\text{th}}$  DI (dose**  
 50 **intensity),  $n^{\text{th}}$  PDI (planned dose intensity), and  $n^{\text{th}}$  RDI (relative dose intensity). (B-I)  $n^{\text{th}}$  RDI**  
 51 **and the fraction of patients receiving less than 80% of  $n^{\text{th}}$  PDI of cyclophosphamide (B and C),**  
 52 **doxorubicin (D and E), rituximab (F and G), and vincristine (H and I) for each cycle. Here,**

53 when analyzing the  $n^{\text{th}}$  RDI, patients are subgrouped into the  $n^{\text{th}}$  accumulated morning group  
54 (nAMG) if the number of morning treatments is equal to or larger than that of afternoon  
55 treatments until the  $n^{\text{th}}$  treatment. Otherwise, they are subgrouped into the  $n^{\text{th}}$  accumulated  
56 afternoon group (nAAG). RDI decreases in the nAMG but not in the nAAG when treatment is  
57 ongoing (B, D, F, and H left). Thus, RDI becomes lower in the nAMG than in the nAAG for  
58 the latter part of the R-CHOP chemotherapy (i.e., 3<sup>rd</sup>, 4<sup>th</sup> and 5<sup>th</sup> therapies). In particular, it  
59 becomes statistically significant in the last (i.e., 5<sup>th</sup>) measured RDI except for rituximab. Such  
60 lower RDI of cyclophosphamide, doxorubicin, and rituximab in the nAMG than in the nAAG  
61 is mainly due to the lower RDI in the female nAMG than in the female nAAG in the latter part  
62 of the therapy (B, D, and F center); RDI in male patients is not different between the nAMG  
63 and the nAAG (B, D, and F right). Accordingly, the fraction in the latter part becomes higher  
64 in the female nAMG than in the female nAAG (C, E, and G center) while there is no difference  
65 between the male nAMG and the male nAAG (C, E, and G right). Unlike other drugs, RDI of  
66 vincristine decreases in both the female nAMG and the male nAMG (H). However, the fraction  
67 in the latter is not statistically different between the nAMG and the nAAG in either female or  
68 male patients (I). Here, 129 patients in the adverse event cohort were analyzed. *P*-values in (B,  
69 D, F, and H) and those in (C, E, G, and I) were calculated by Mann-Whitney *U* test and Chi-  
70 square test, respectively. Solid circles and error bars in B, D, F, and H denote median and IQR.

71

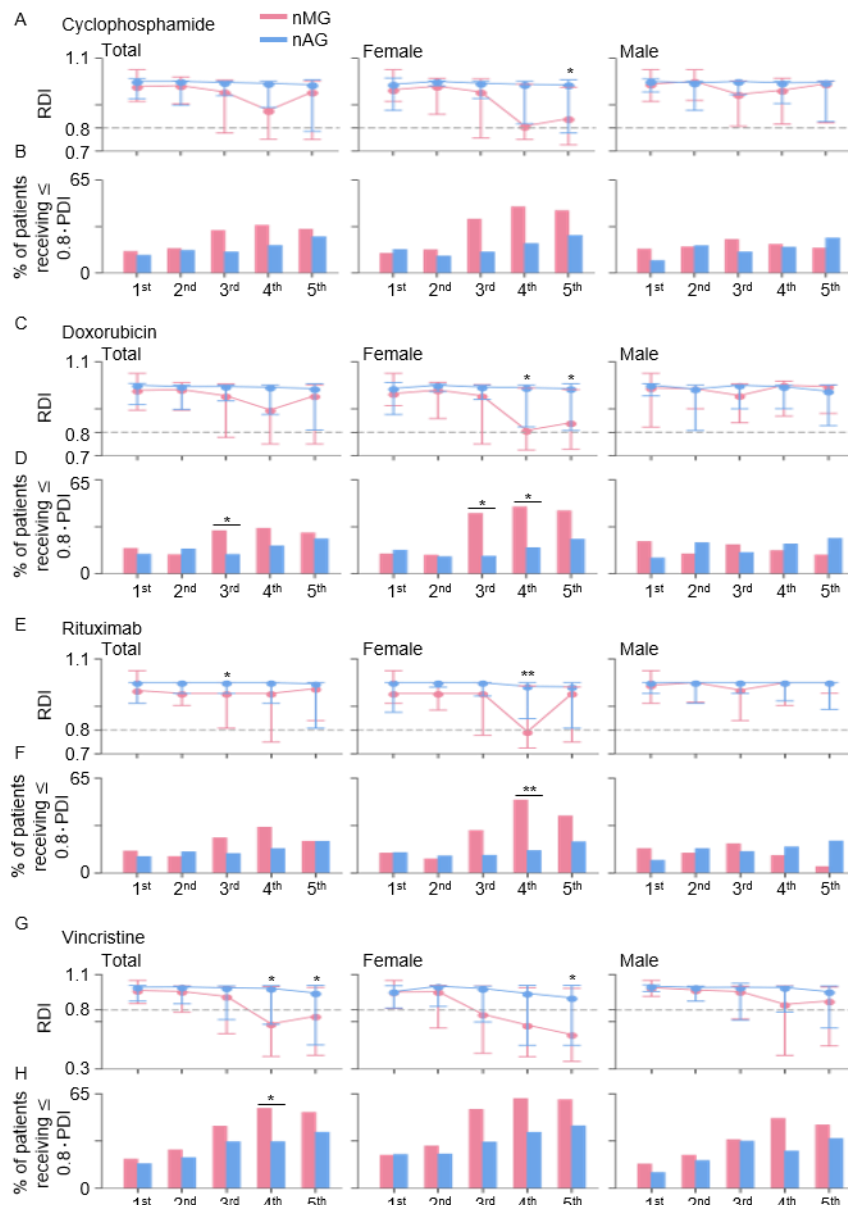

72

73 **Supplemental Figure 5. Dose intensity for a specific treatment cycle according to sex and**  
 74 **time of the day of R-CHOP before the cycle. (A-H)  $n^{\text{th}}$  RDI and the fraction of patients**  
 75 **receiving less than 80% of  $n^{\text{th}}$  PDI of cyclophosphamide (A and B), doxorubicin (C and D),**  
 76 **rituximab (E and F), and vincristine (G and H) for each cycle. Here, when analyzing the  $n^{\text{th}}$**   
 77 **RDI, patients are subgrouped into the  $n^{\text{th}}$  morning group (nMG) if their previous treatment time**  
 78 **is morning. Otherwise, they are subgrouped into the  $n^{\text{th}}$  afternoon group (nAG). When**



79 treatment is in progress, RDI of cyclophosphamide, doxorubicin, and rituximab decreases in  
80 the nMG, in particular after the 4<sup>th</sup> treatment, while it does not in the nAG (A, C, E, and G left).  
81 This is mainly due to the lower RDI in the female nMG than in the female nAG in the later  
82 treatments (A, C, and E center); there is no difference between the male nMG and the male  
83 nAG (A, C, and E right). Accordingly, there is a higher fraction in the female nMG receiving  
84 less than 80% of PDI than in the female nAG; the majority show a very slight trend toward  
85 significance ( $P < 0.2$ ) in the latter parts of the therapy (B, D, and F center). In contrast, there is  
86 no such trend for the male patients (B, D, and F right). The RDI of vincristine decreases in both  
87 the female nAMG and the male nAMG (G). However, the fraction receiving less than 80% of  
88 PDI in the later treatments is not statistically different between the nAMG and the nAAG in  
89 either female or male patients (H). Here, 129 patients in the adverse event cohort were analyzed.  
90 *P*-values in (A, C, E, and G) and those in (B, D, F, and H) were calculated by Mann-Whitney  
91 *U* test and Chi-square test, respectively. Solid circles and error bars in A, C, E, and G denote  
92 median and IQR.
