# Supplementary material for: Chemotherapy delivery time affects treatment outcomes of female patients with diffuse large B cell lymphoma
Source: JCI journal article supplement (doi:10.1172/jci.insight.164767), 2022-12-13
Supplement: sd1 [file 1]

You are being redirected.
